# Supplementary material for: Understanding synergetic effects of Zn and Rh–Cr promotion to wide-bandgap Ga, Ta and Ti oxides in photocatalytic water splitting
Source: Royal Society of Chemistry journal article supplement (doi:10.1039/c5cy01681a), 2016-01-01
Supplement: c5cy01681a1.pdf [file c5cy01681a1.pdf]

## **Supporting Information**

### **Understanding synergetic effects of Zn and Rh-Cr promotion to wide-bandgap Ga, Ta and Ti oxides in photocatalytic water splitting**

Antonio Bazzo and Atsushi Urakawa\*

Institute of Chemical Research of Catalonia (ICIQ),  
The Barcelona Institute of Science and Technology,  
Av. Països Catalans 16, 43007 Tarragona, Spain.

\*Corresponding author. Email: [aurakawa@iciq.es](mailto:aurakawa@iciq.es)

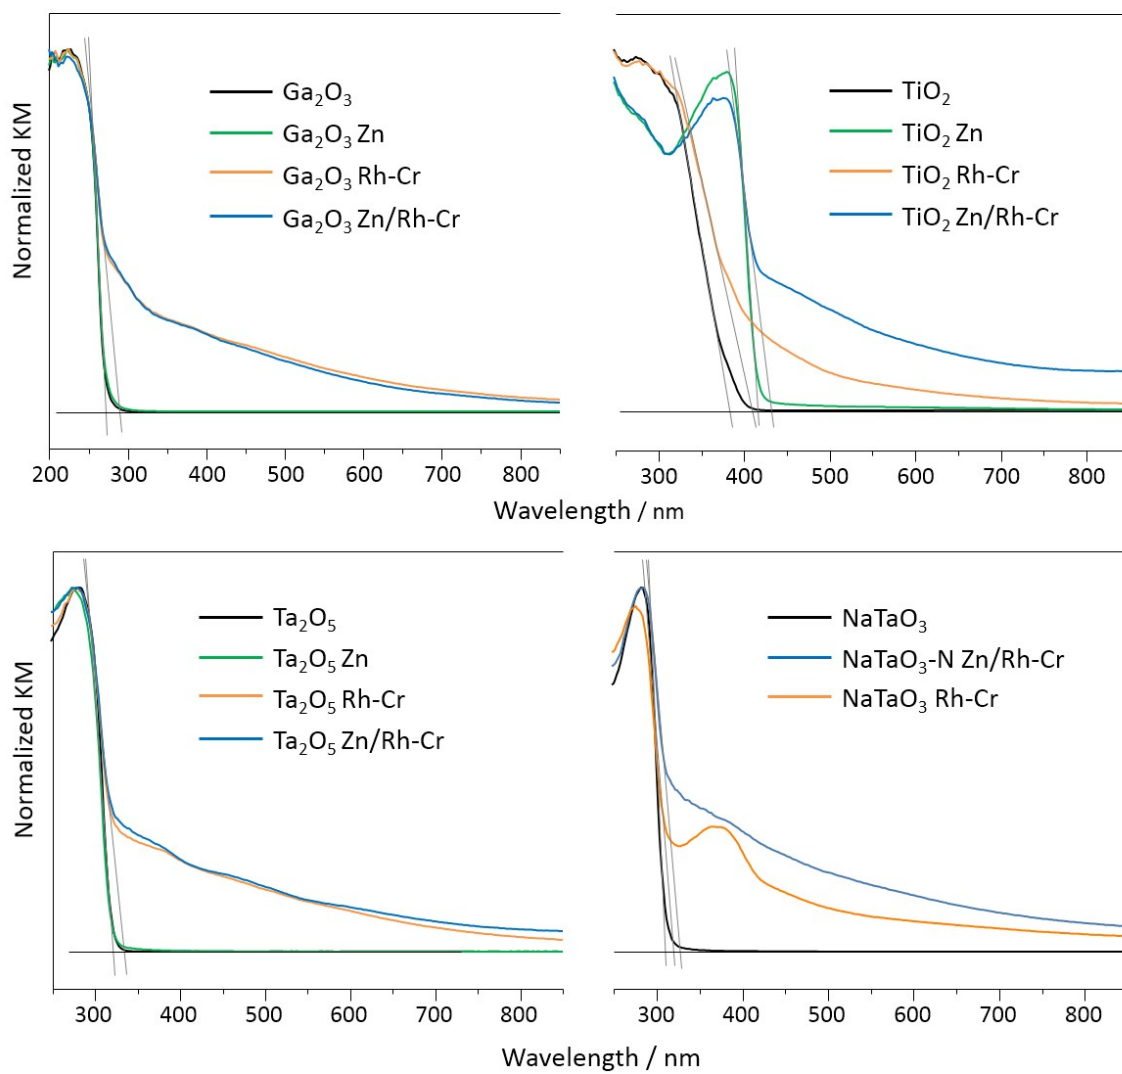

**Figure S1.** Diffuse reflectance KM plots of the used photocatalysts. Tauc plot intersecting lines are visualized in grey.

**Table S1.** KM plot derived  $\lambda_{\text{onset}}$  and corresponding  $E_g$  values (by the formula  $E_g = 1240/\lambda_{\text{onset}}$  ).

| Material                                | $\lambda_{\text{onset}}/\text{nm}$ | $E_g$<br>/ eV | Material                                | $\lambda_{\text{onset}}/\text{nm}$ | $E_g$<br>/ eV |
|-----------------------------------------|------------------------------------|---------------|-----------------------------------------|------------------------------------|---------------|
| TiO <sub>2</sub>                        | 382                                | 3.25          | Ta <sub>2</sub> O <sub>5</sub>          | 321                                | 3.86          |
| TiO <sub>2</sub> Zn                     | 416                                | 2.98          | Ta <sub>2</sub> O <sub>5</sub> Zn       | 321                                | 3.86          |
| TiO <sub>2</sub> Rh-Cr                  | 409                                | 3.03          | Ta <sub>2</sub> O <sub>5</sub> Rh-Cr    | 334                                | 3.71          |
| TiO <sub>2</sub> Zn/Rh-Cr               | 432                                | 2.87          | Ta <sub>2</sub> O <sub>5</sub> Zn/Rh-Cr | 334                                | 3.71          |
| Ga <sub>2</sub> O <sub>3</sub>          | 270                                | 4.59          | NaTaO <sub>3</sub> -N                   | 310                                | 4.01          |
| Ga <sub>2</sub> O <sub>3</sub> Zn       | 270                                | 4.59          | NaTaO <sub>3</sub> -N Zn/Rh-Cr          | 327                                | 3.79          |
| Ga <sub>2</sub> O <sub>3</sub> Rh-Cr    | 290                                | 4.28          | NaTaO <sub>3</sub> Rh-Cr                | 319                                | 3.89          |
| Ga <sub>2</sub> O <sub>3</sub> Zn/Rh-Cr | 290                                | 4.28          |                                         |                                    |               |

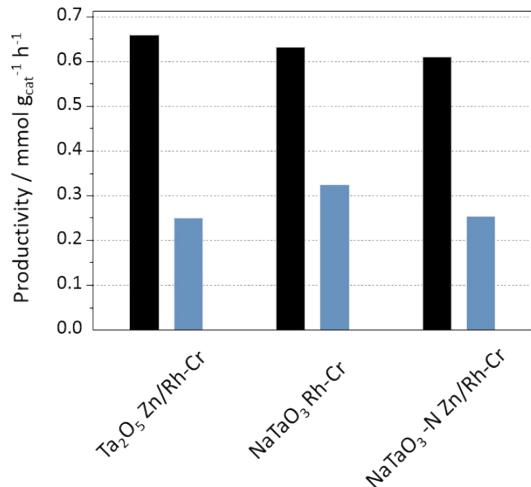

| Catalyst                                | H <sub>2</sub> | O <sub>2</sub> |
|-----------------------------------------|----------------|----------------|
| Ta <sub>2</sub> O <sub>5</sub> Zn-Rh/Cr | 0.66           | 0.25           |
| NaTaO <sub>3</sub> Rh-Cr                | 0.63           | 0.32           |
| NaTaO <sub>3</sub> -N Zn/RhCr           | 0.61           | 0.27           |

**Figure S2.** Comparison of H<sub>2</sub> and O<sub>2</sub> steady-state productivity of Ta<sub>2</sub>O<sub>5</sub> Zn/Rh-Cr, NaTaO<sub>3</sub> Rh-Cr and NaTaO<sub>3</sub>-N Zn/Rh-Cr catalysts in slurry reactor (left), and correspondent H<sub>2</sub> and O<sub>2</sub> productivity (mmol·g<sup>-1</sup>·h<sup>-1</sup>) values (right).

During the course of our investigations, many tantalum based materials in the general form MTaO<sub>3</sub> (where M = Na or K) have been synthesized as promising candidates for overall water splitting. As further variety, different doping and co-catalyst impregnation have been attempted. La and N doping but also Cu, Fe, and Ti doping, using a hydrothermal synthesis approach. Ni, Pt, and Ru based co-catalyst impregnation on different tantalate substrate were also performed and these materials were tested for water splitting activity. NaTaO<sub>3</sub> materials were synthesized by urea combustion<sup>1</sup>, and hydrothermal<sup>2</sup> techniques. Urea combustion NaTaO<sub>3</sub> samples were prepared from Ta<sub>2</sub>O<sub>5</sub>, Na<sub>2</sub>CO<sub>3</sub>, and CO(NH<sub>3</sub>)<sub>2</sub> (molar ratio 1 : 1 : 4), mixed in a thick water slurry, dried at 353 K and crushed in a mortar. The urea blended precursors were then slowly heated (2 K/min) up to 573 K and subsequently brought to 873 K (5 K/min, 4 h).

Hydrothermal N-doped NaTaO<sub>3</sub> nanocubes were prepared in a Teflon lined autoclave. A Ta<sub>2</sub>O<sub>5</sub>, NaOH and NH<sub>4</sub>OH (molar ratio 1 : 33 : 7.5) solution-suspension in water was prepared and heated at 453 K for 12 h under hydrothermal conditions. The solid product was then washed by centrifugation and dried at 353 K.

Contrarily to our expectation, no one of these materials was capable of overall water splitting activity or oxygen production in either slurry or gas phase. Hydrogen evolution productivity was in most case present, but at level in the range of bare  $\text{Ta}_2\text{O}_5$ , i.e. more than one order of magnitude inferior to data reported in literature for tantalate materials.

Remarkably different behaviour was observed for  $\text{NaTaO}_3\text{-N Zn/Rh-Cr}$  and  $\text{NaTaO}_3\text{ Rh-Cr}$  loaded catalysts. They exhibited excellent quasi-stoichiometric  $\text{H}_2$  and  $\text{O}_2$  evolution in slurry under UV irradiation.

The two Rh-Cr modified tantalum oxide display very similar catalytic activity. Especially, Zn doping does not seem to have any relevant (or even slightly negative) effect on the productivity. Even more importantly, the productivity is equivalent to what observed for  $\text{Ta}_2\text{O}_5\text{ Zn/Rh-Cr}$ , with a possible slight improvement in oxygen evolution (which gets closer to the desired stoichiometry). These findings showed that crystal structure only played a marginal role in determining the activity of Rh-Cr impregnated tantalum based materials, supporting a non-semiconductor-based mechanism. Other parameters, such as the presence of specific Ta-O surface active units, and their interaction with the Rh-Cr co-catalyst, could be better explaining the similar catalytic activity observed for the  $\text{Ta}_2\text{O}_5$  and  $\text{MTaO}_4$  materials.

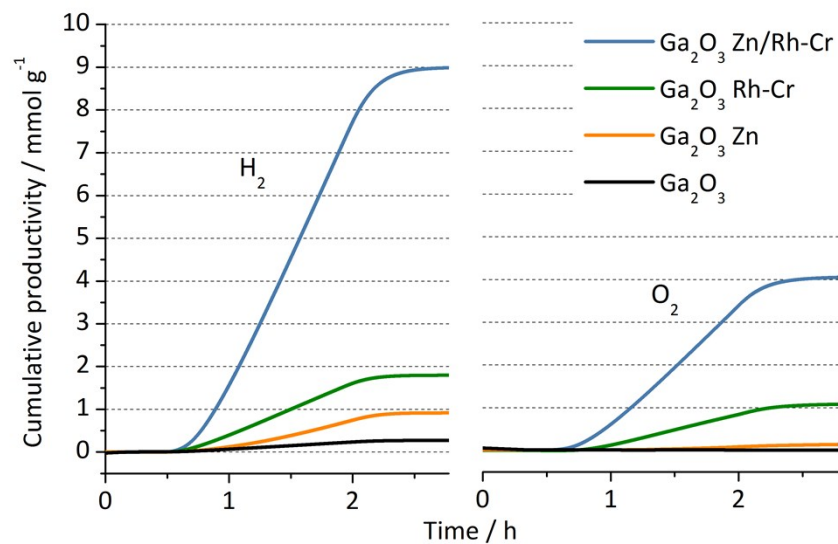

**Figure S3.** H<sub>2</sub> and O<sub>2</sub> cumulative productivity profiles with the unpromoted and promoted Ga<sub>2</sub>O<sub>3</sub> catalysts in the continuous flow slurry reactor under 1.5 h UV (high pressure Hg lamp) irradiation (ON at 0.5 h, OFF at 2 h), calculated from the concentration profiles shown in **Fig. 3**.

1. J. Xu, Y. He, J. Zhang, J. Qian, D. Xu, X. He and D. Yang, *Micro & Nano Lett*, **2012**, 7, 72-75.
2. H. Fu, S. Zhang, L. Zhang and Y. Zhu, *Mater. Res. Bull.*, **2008**, 43, 864-872.
